# Supplementary material for: Immune Selection and Within-Host Competition Can Structure the Repertoire of Variant Surface Antigens in Plasmodium falciparum - A Mathematical Model
Source: PubMed Central journal article supplement (PMC2842302; doi:10.1371/journal.pone.0009778), 2010-03-22
Supplement: pone.0009778.s001.pdf [file pone.0009778.s001.pdf]

# Figure S1 - Model diagram

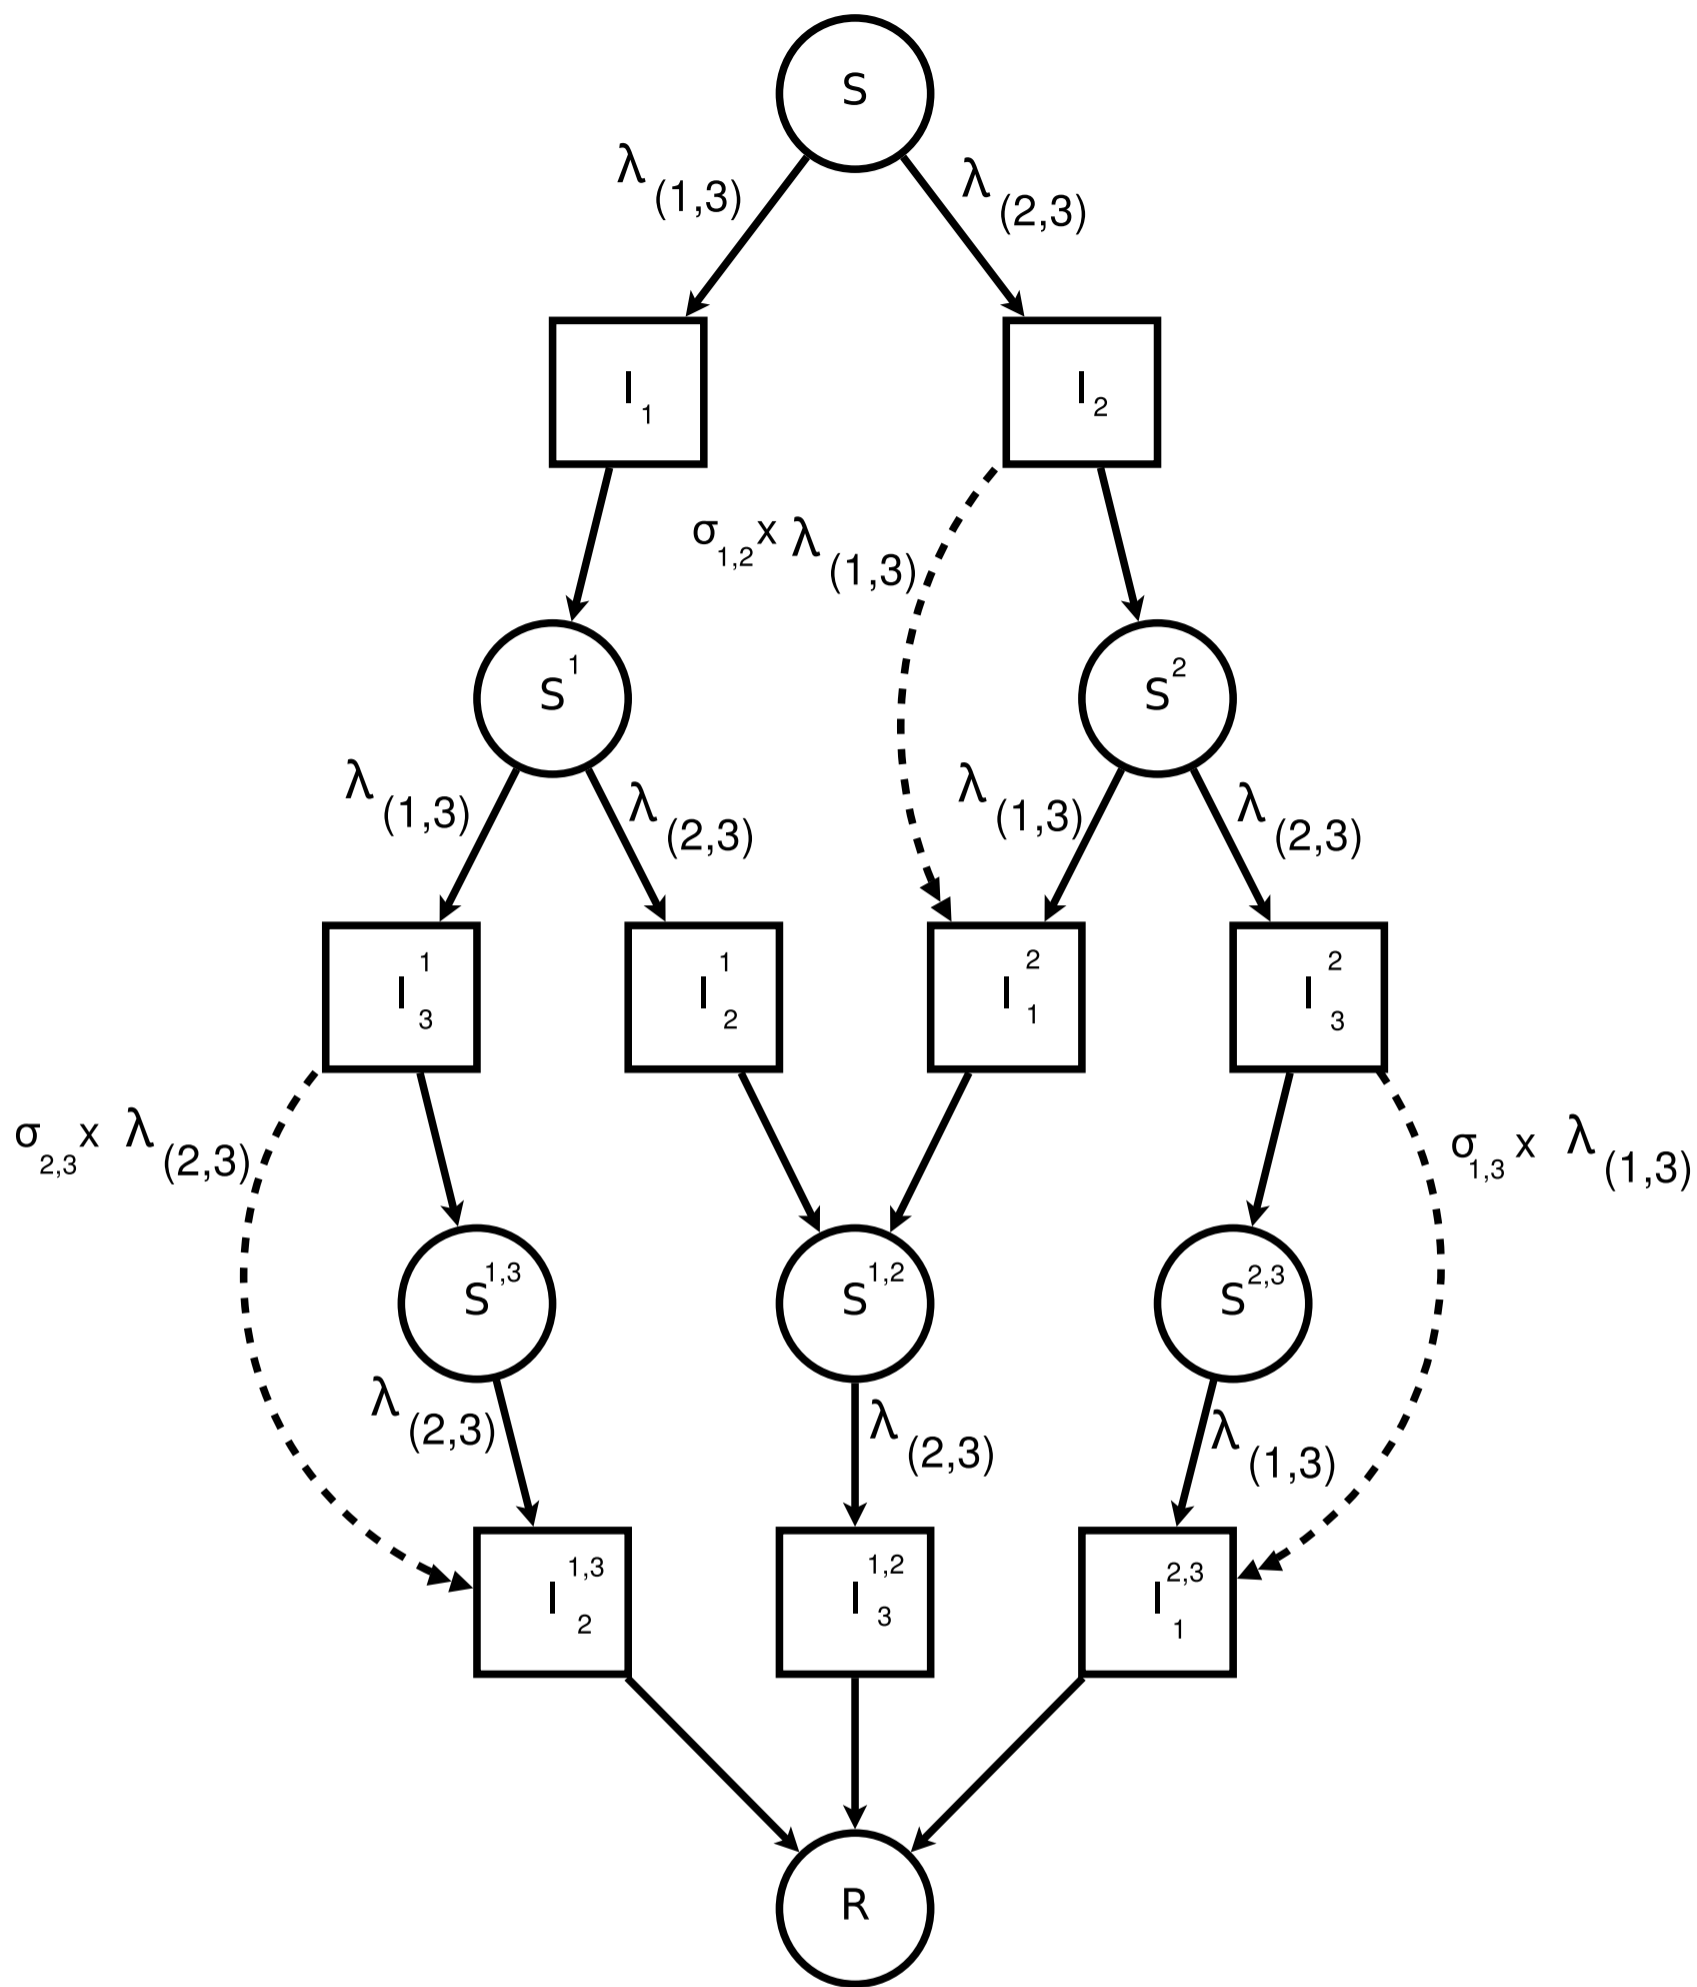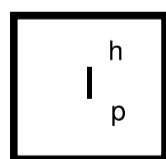

Infected host with immune history  $h$  and expressed VSA block  $p$

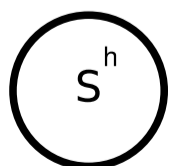

Susceptible host with immune history  $h$

$\lambda_{(a,b)}$  Force of infection by parasites with VSA blocks  $a$  and  $b$ .

$\sigma \times \lambda_{(a,b)}$  Probability of being superinfected by parasites  $(a,b)$
